# Supplementary material
Source: MDPI journal article supplement (https://www.mdpi.com/2073-4344/14/5/318)
Supplement: s1 [file s1]

# Direct Synthesis of Calcium Lactate through the Reaction of Glycerol with Calcium Hydroxide Catalyzed by Bimetallic AuCu/SiO<sub>2</sub> Nanocatalysts

Changqing Li, Xinyue Cui, Aili Wang \*, Hengbo Yin \*, Yuting Li, Qiao Lin and Junjie Guo

Faculty of Chemistry and Chemical Engineering, Jiangsu University, Zhenjiang 212013, China; licup@163.com (C.L.); xycui51@163.com (X.C.)

\* Correspondence: alwang@ujs.edu.cn (A.W.); yin@ujs.edu.cn (H.Y.)

## Supporting materials

**Table S1** Glycerol conversion rates under various reaction conditions catalyzed by the Au<sub>0.5</sub>Cu<sub>10</sub>/SiO<sub>2</sub> catalyst

| Reaction conditions                            |                                           |                            |                                        | Glycerol conversions (%) | $-r_A$ (mol·L <sup>-1</sup> ·h <sup>-1</sup> ) |
|------------------------------------------------|-------------------------------------------|----------------------------|----------------------------------------|--------------------------|------------------------------------------------|
| Glycerol concentrations (mol·L <sup>-1</sup> ) | Ca(OH) <sub>2</sub> /glycerol mole ratios | Reaction temperatures (°C) | Catalyst contents (g·L <sup>-1</sup> ) |                          |                                                |
| 2                                              | 0.5:1                                     | 200                        | 9.2                                    | 39                       | 1.55                                           |
| 2                                              | 0.55:1                                    | 200                        | 9.2                                    | 46                       | 1.85                                           |
| 2                                              | 0.6:1                                     | 200                        | 9.2                                    | 53                       | 2.13                                           |
| 2                                              | 0.8:1                                     | 200                        | 9.2                                    | 65                       | 2.61                                           |
| 2                                              | 0.6:1                                     | 160                        | 9.2                                    | 16                       | 0.65                                           |
| 2                                              | 0.6:1                                     | 180                        | 9.2                                    | 26                       | 1.03                                           |
| 2                                              | 0.6:1                                     | 230                        | 9.2                                    | 79                       | 3.15                                           |
| 0.5                                            | 0.6:1                                     | 200                        | 9.2                                    | 33                       | 1.32                                           |
| 1.0                                            | 0.6:1                                     | 200                        | 9.2                                    | 43                       | 1.71                                           |
| 3.0                                            | 0.6:1                                     | 200                        | 9.2                                    | 63                       | 2.51                                           |
| 2                                              | 0.6:1                                     | 200                        | 1.84                                   | 16                       | 0.63                                           |
| 2                                              | 0.6:1                                     | 200                        | 4.6                                    | 27                       | 1.08                                           |
| 2                                              | 0.6:1                                     | 200                        | 6.44                                   | 37                       | 1.49                                           |

The reaction time is 0.5 h.
